# Supplementary material
Source: Royal Society of Chemistry journal article supplement (doi:10.1039/d6ma00175k)
Supplement: d6ma00175k1.pdf [file d6ma00175k1.pdf]

## Supplementary Information

### Design and Characterization of Bioinspired Green Lipoic Acid-Syringic Acid-Based Hydrogel for Wound Healing

Navneet Thakur<sup>1,2</sup>, Ruchika<sup>1,2</sup>, Neha Rana<sup>1,2</sup>, Vikram Patial<sup>1,2</sup>, Ankit Saneja<sup>1,2\*</sup>

<sup>1</sup>Dietetics and Nutrition Technology Division, CSIR-Institute of Himalayan Bioresource Technology, Palampur-176061, Himachal Pradesh, India

<sup>2</sup>Academy of Scientific and Innovative Research (AcSIR), Ghaziabad, 201002, India

#### \*Corresponding Authors

Dr. Ankit Saneja

Senior Scientist

Dietetics and Nutrition Technology Division,

CSIR – Institute of Himalayan Bioresource Technology,

Palampur, 176061

Himachal Pradesh, India

E-mail: [ankitsaneja@ihbt.res.in](mailto:ankitsaneja@ihbt.res.in), [ankitsaneja.ihbt@gmail.com](mailto:ankitsaneja.ihbt@gmail.com)

Tel: 91-1894-233339, Ext: 485

---

## Table of Content

---

### Fig.s

|         |                                                                                                                        |   |
|---------|------------------------------------------------------------------------------------------------------------------------|---|
| Fig. S1 | $^1\text{H}$ NMR spectrum of LA in DMSO- $d_6$ at 400 MHz                                                              | 3 |
| Fig. S2 | $^1\text{H}$ NMR of SA in DMSO- $d_6$ at 400 MHz                                                                       | 4 |
| Fig. S3 | $^1\text{H}$ NMR of poly-LA hydrogel (LA-G) in DMSO- $d_6$ at 400 MHz                                                  | 5 |
| Fig. S4 | $^1\text{H}$ NMR of poly-LA-SA hydrogel (LAS-G) in DMSO- $d_6$ at 400 MHz                                              | 6 |
| Fig. S5 | EDX spectra of LA-G and LAS-G hydrogels                                                                                | 7 |
| Fig. S6 | High-resolution deconvoluted S2p spectra of hydrogels via non-linear curve fitting: <b>a)</b> LA-G and <b>b)</b> LAS-G | 8 |
| Fig. S7 | Macroscopic images of wounds: Control, Standard, LA-G, and LAS-G group post-wound induction                            | 8 |

### Tables

|          |                                                     |   |
|----------|-----------------------------------------------------|---|
| Table S1 | Surface elemental composition of LA-G and LAS-G gel | 9 |
|----------|-----------------------------------------------------|---|

---

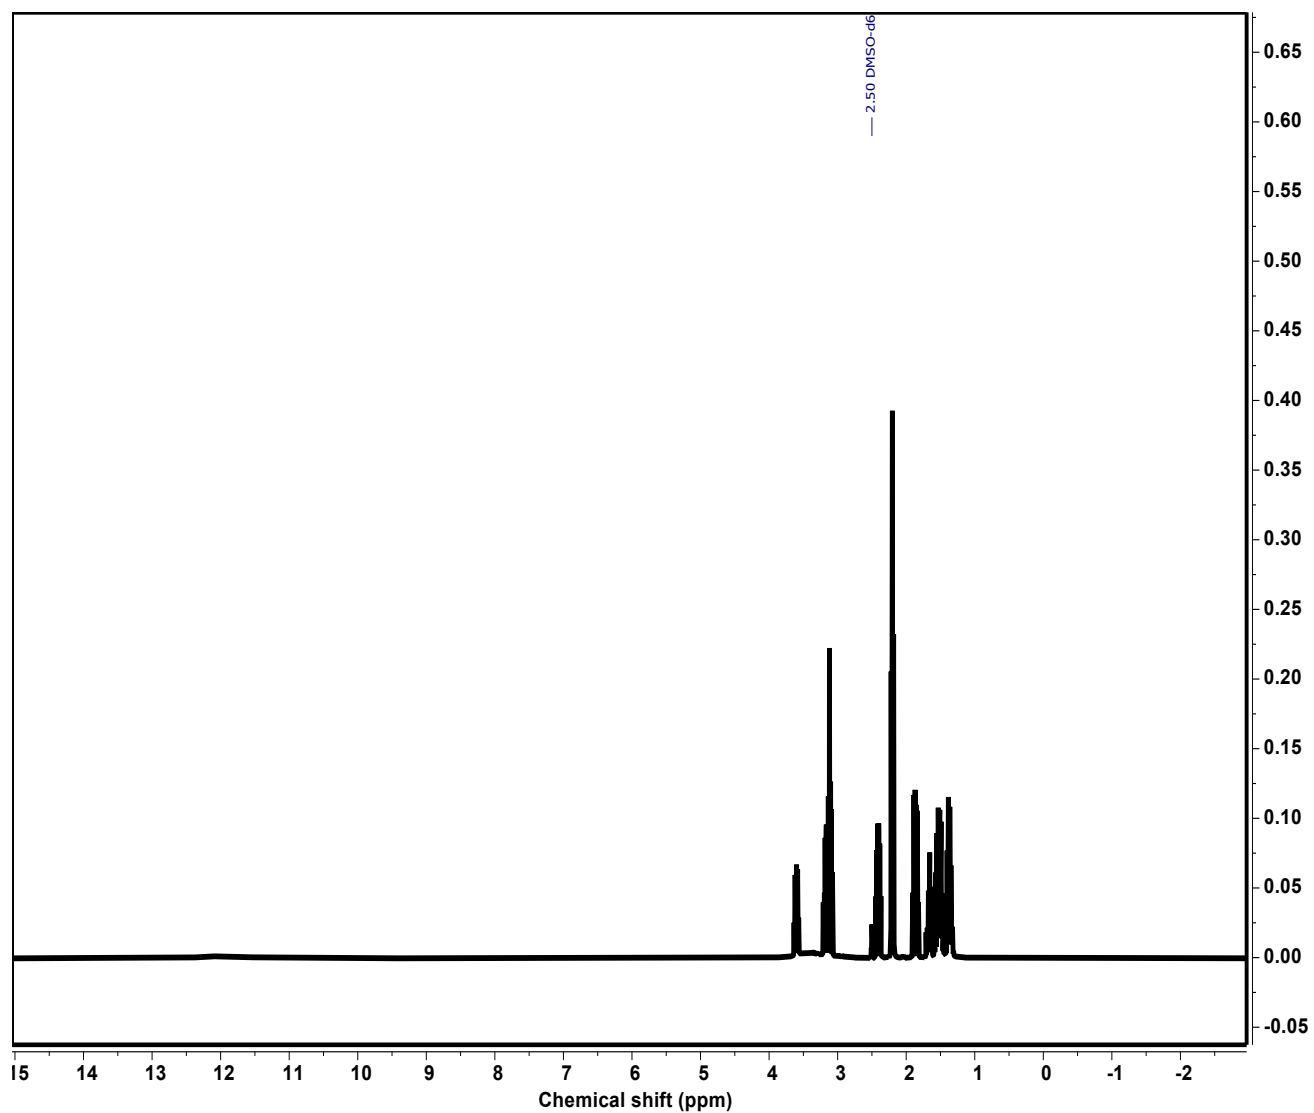

**Fig. S1:** 1H NMR spectrum of LA in DMSO-d6 at 400 MHz

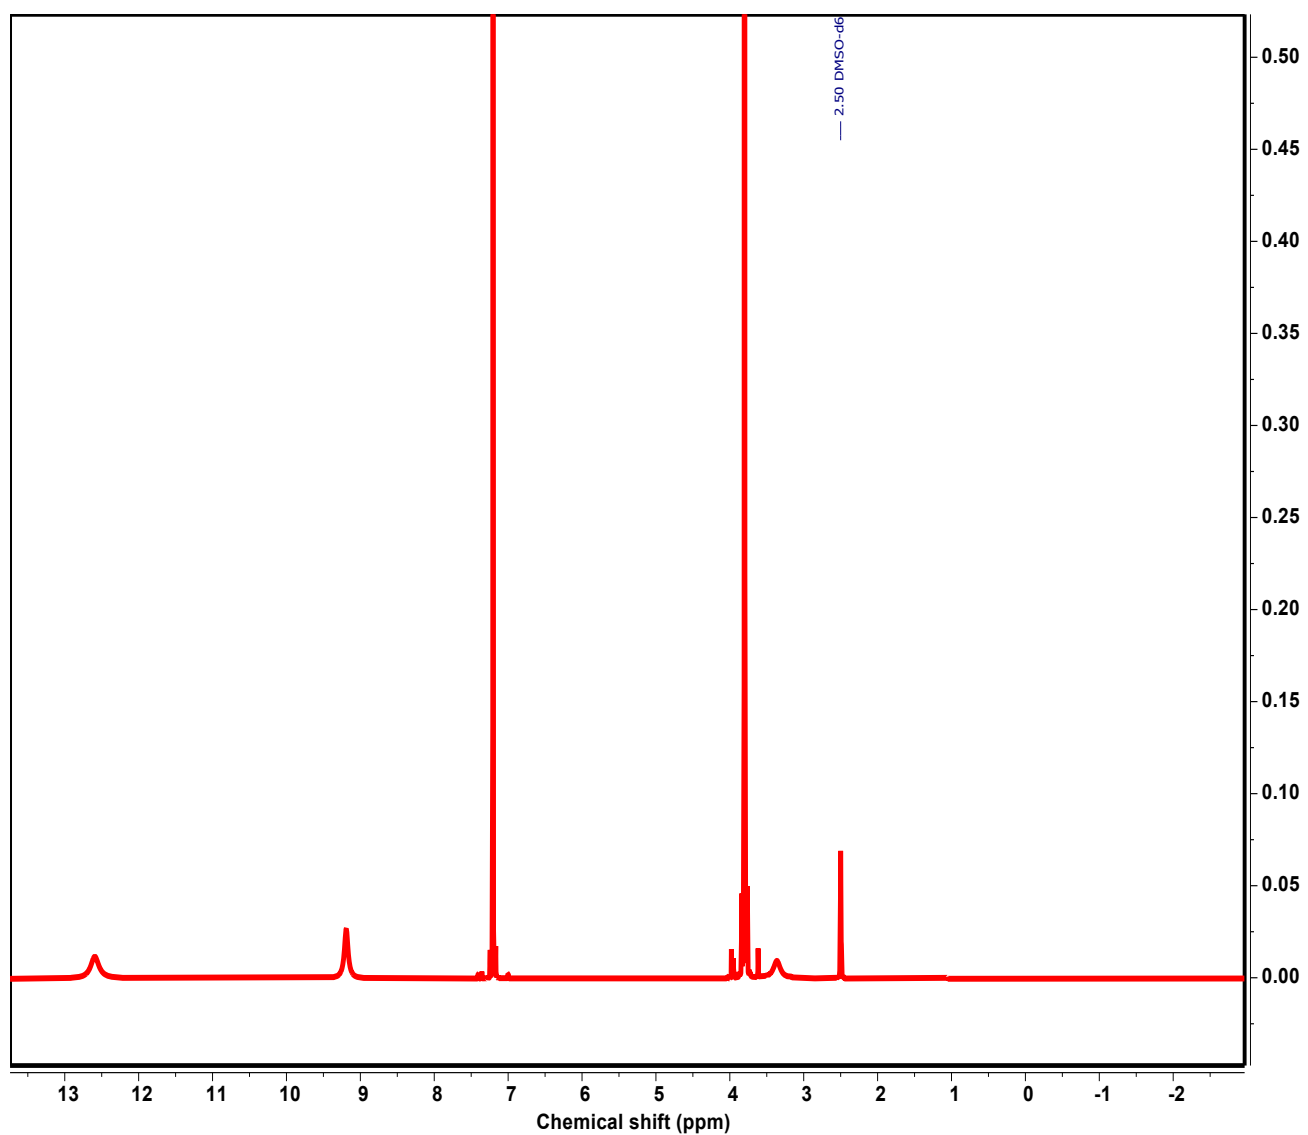

**Fig. S2:**  $^1\text{H}$  NMR spectrum of syringic acid (SA) in  $\text{DMSO-d}_6$  at 400 MHz

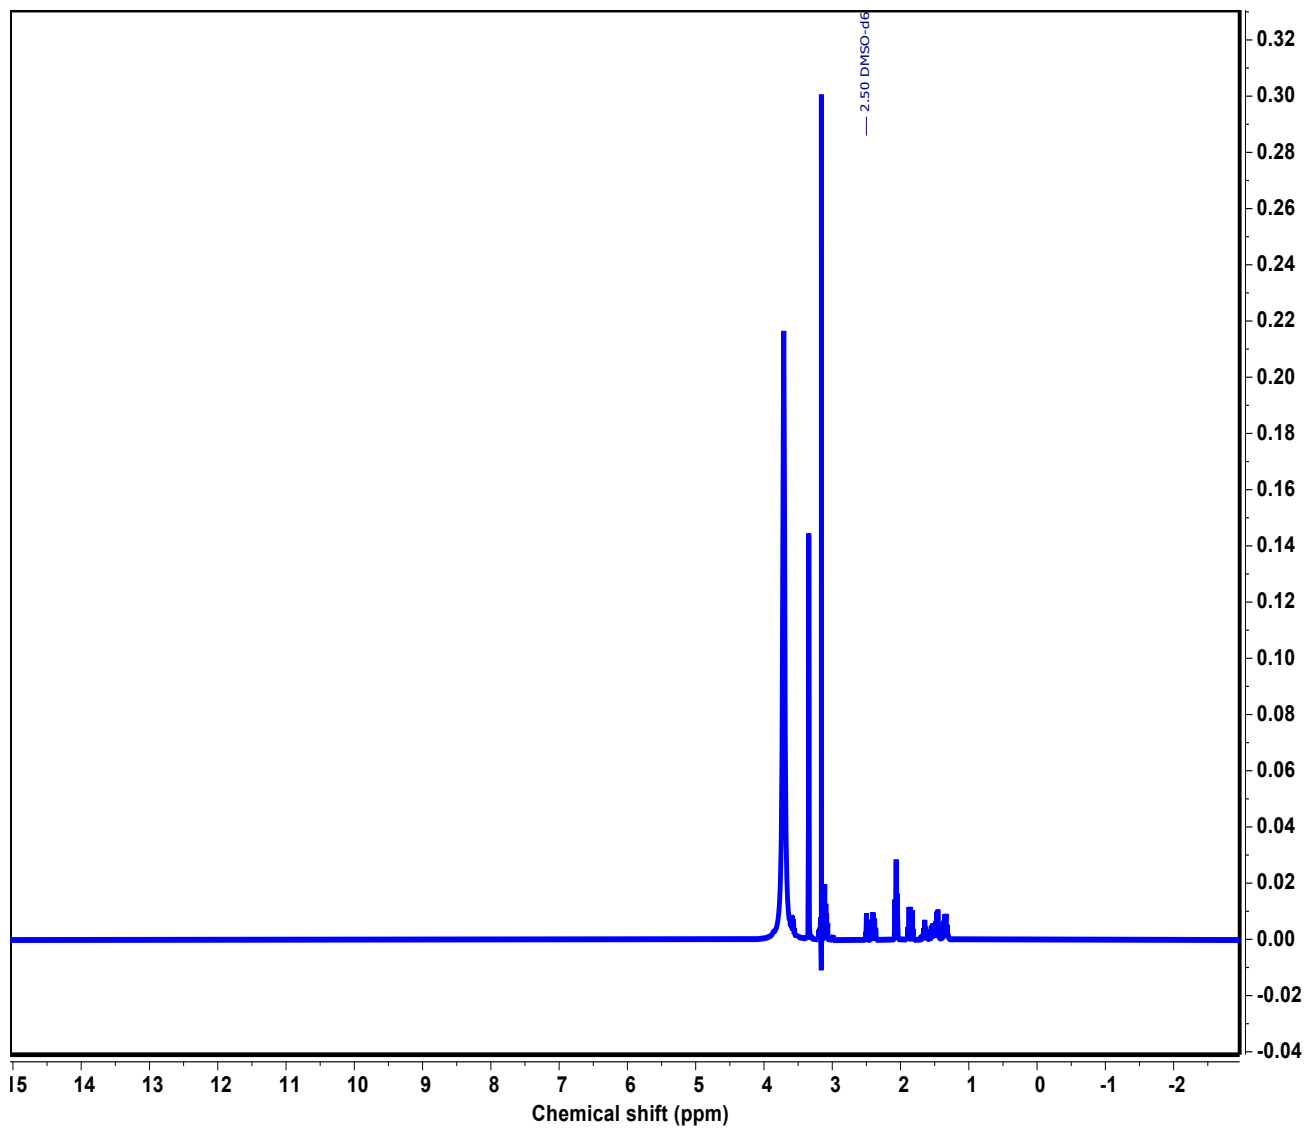

**Fig. S3:** <sup>1</sup>H NMR spectrum of poly-( $\alpha$ -lipoic acid) hydrogel (LA-G) in DMSO-d<sub>6</sub> at 400 MHz

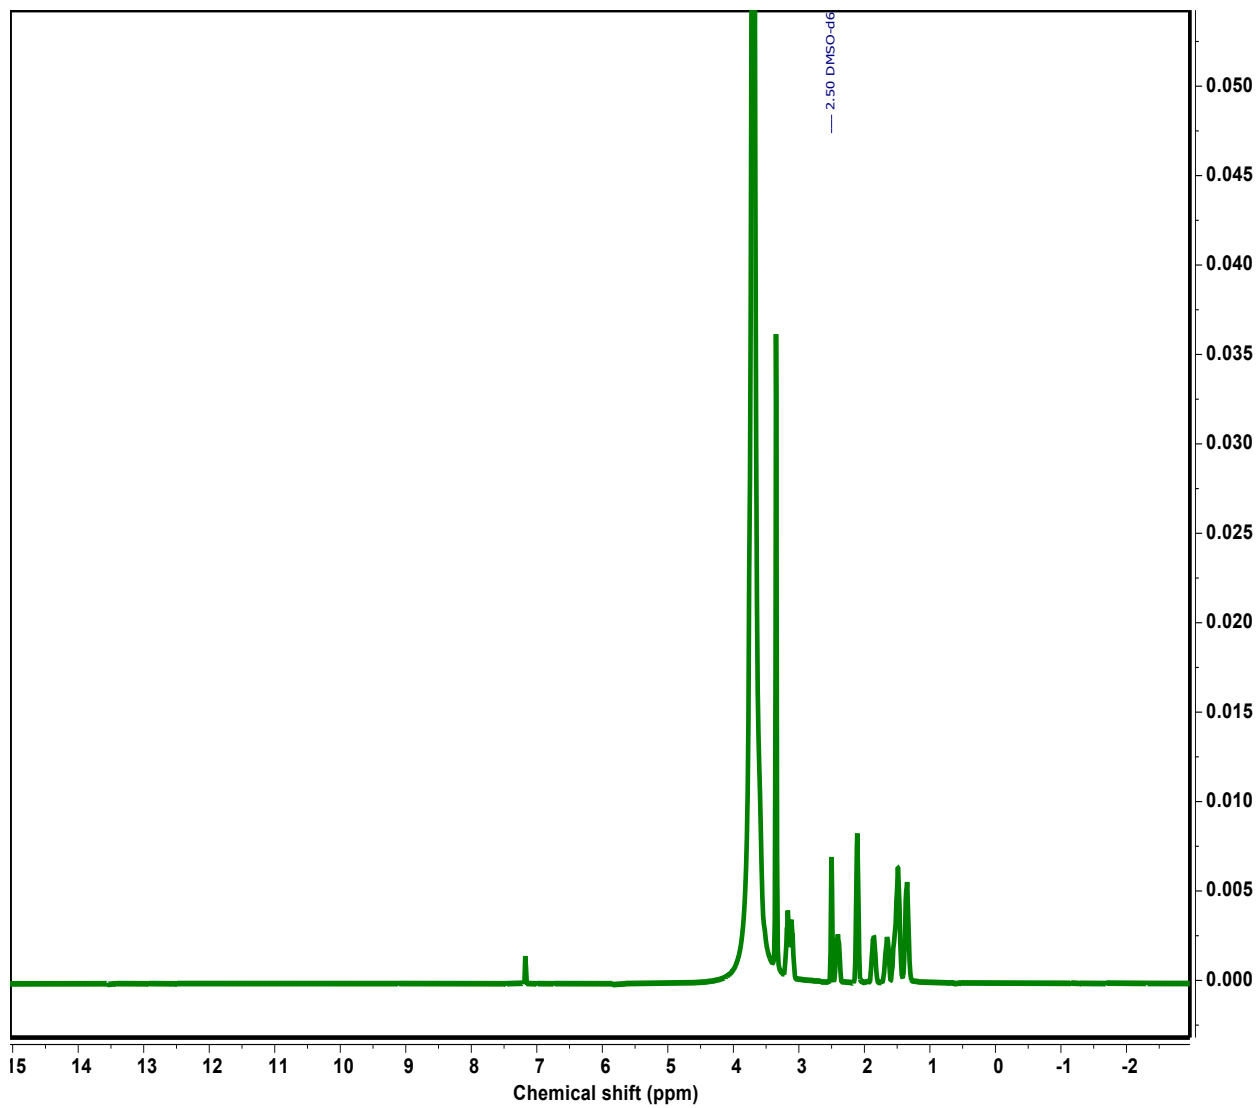

**Fig. S4:**  $^1\text{H}$  NMR spectrum of poly-LA-SA (LAS-G) in  $\text{DMSO-d}_6$  at 400 MHz

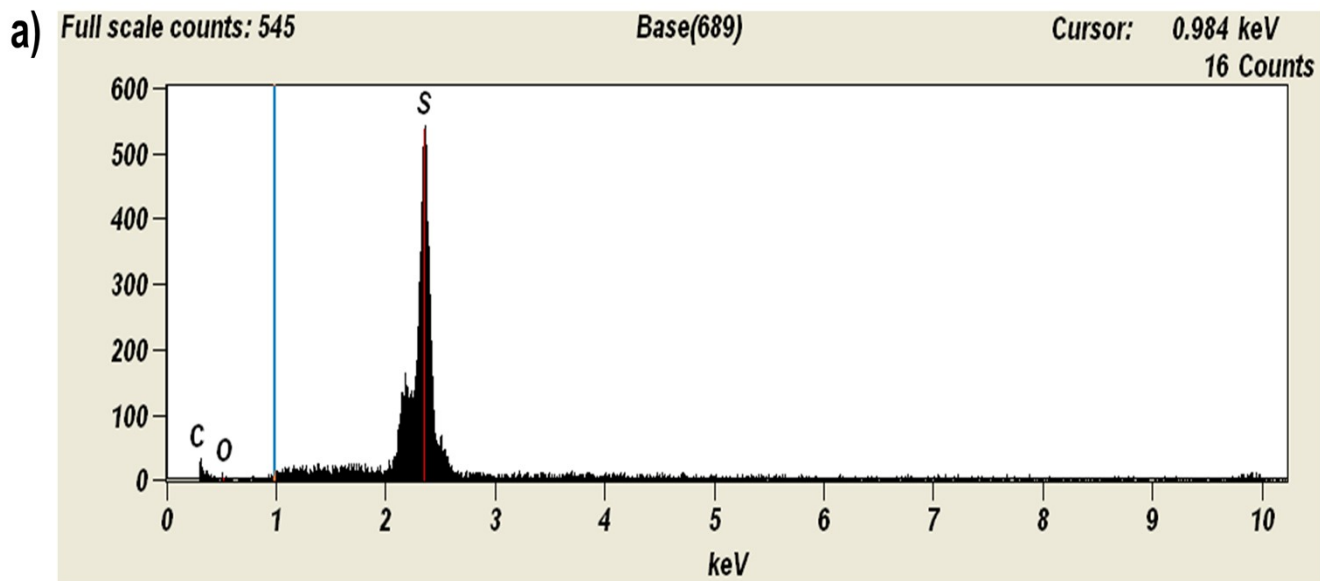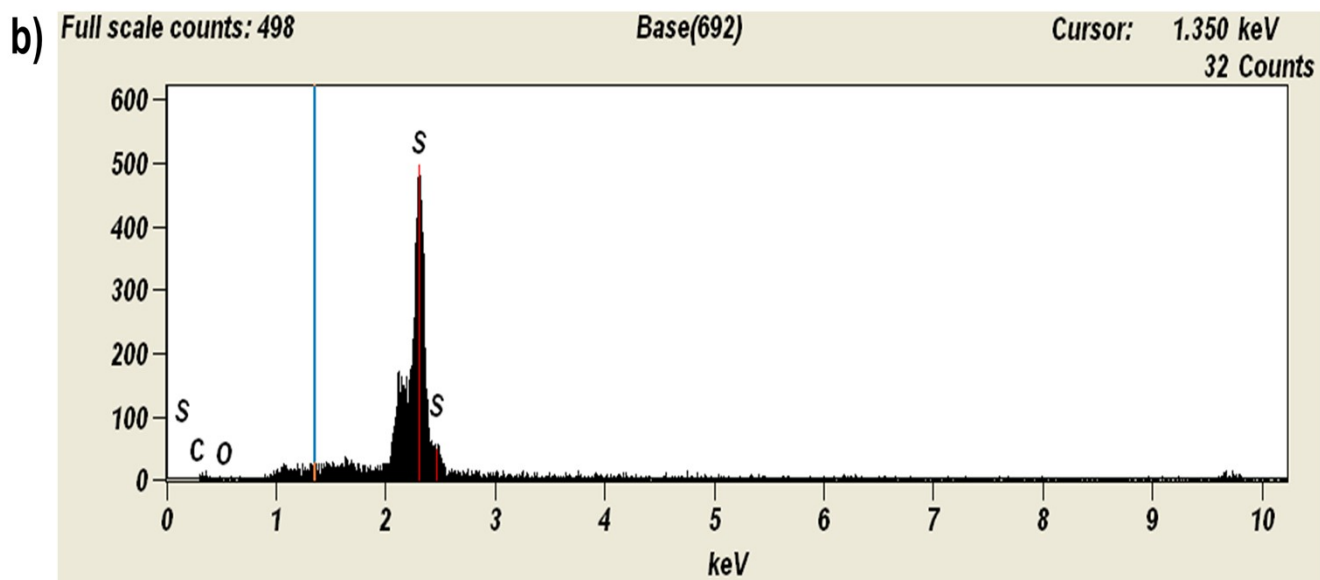

**Fig. S5:** EDX spectra: **a)** poly-LA hydrogel (LA-G); **b)** poly-LA-SA (LAS-G) hydrogel

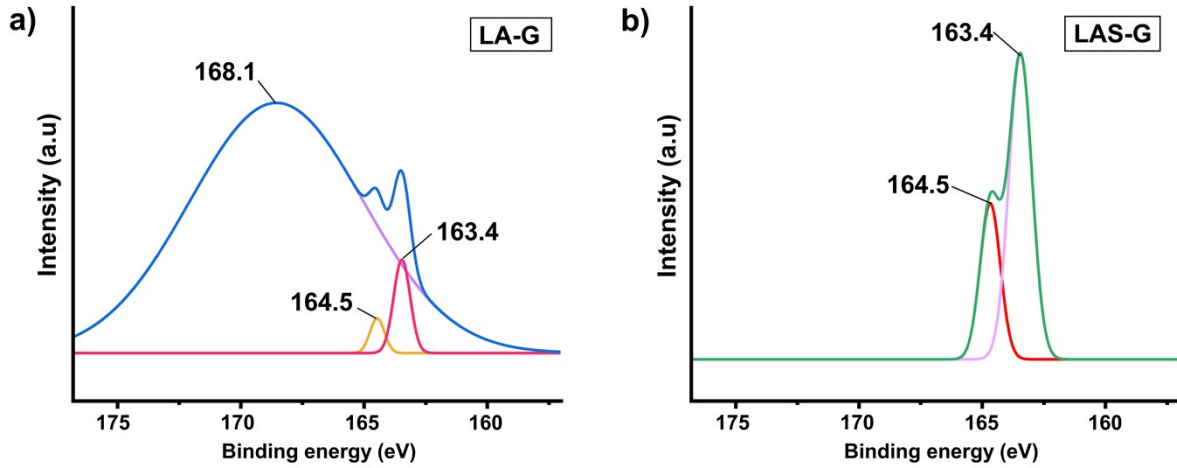

**Fig. S6:** High-resolution deconvoluted S2p spectra of hydrogels via non-linear curve fitting: a) LA-G and b) LAS-G

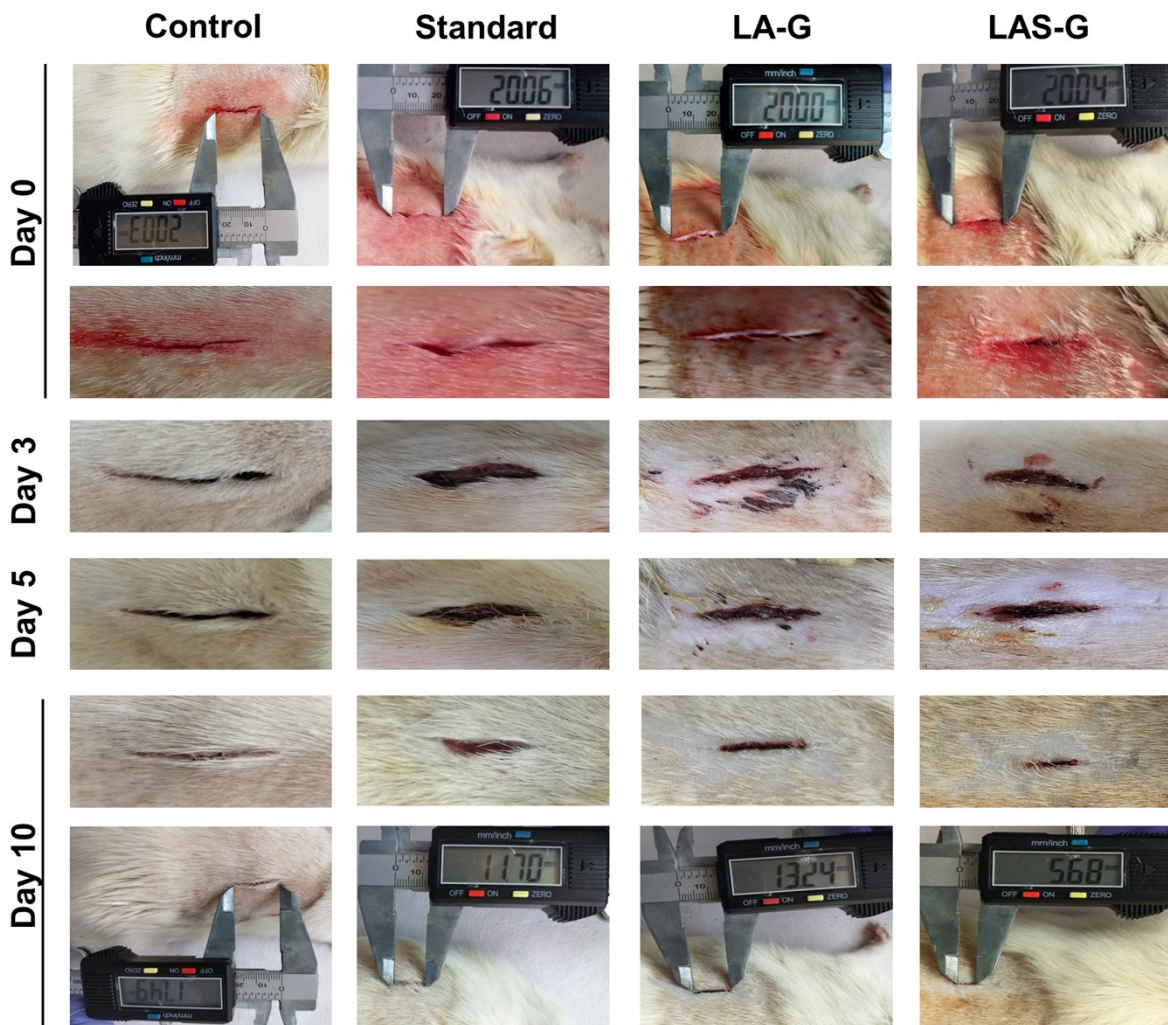

**Fig. S7:** Macroscopic images of wounds: Control, Standard, LA-G and LAS-G group- post wound induction.

**Table S1:** Surface elemental composition of poly-LA hydrogel (LA-G) and poly-LA-SA hydrogel (LAS-G)

| <b>LAS-G</b> |                          |          |
|--------------|--------------------------|----------|
| Name         | Peak Binding Energy (eV) | Atomic % |
| S2p          | 164.17                   | 11.19    |
| C1s          | 285.52                   | 62.49    |
| O1s          | 532.71                   | 22.29    |
| N1s          | 401.88                   | 4.04     |
| <b>LA-G</b>  |                          |          |
| Name         | Peak Binding Energy (eV) | Atomic % |
| S2p          | 168.02                   | 17.87    |
| C1s          | 285.58                   | 34.14    |
| O1s          | 532.76                   | 47.99    |
